# Supplementary material for: An easily synthesizable naphthalene-based sensing platform for Al 3+ and Zn 2+ ions: theoretical insights and live cells imaging
Source: Royal Society of Chemistry journal article supplement (doi:10.1039/d5ay00044k), 2025-01-01
Supplement: d5ay00044k1.pdf [file d5ay00044k1.pdf]

Supporting Material  
for

**Easily synthesizable naphthalene-based sensing platform for Al<sup>3+</sup>  
and Zn<sup>2+</sup> ions: Theoretical insight and live cells imaging**

Jolly Kaushal,<sup>a,\*</sup> Sain Singh,<sup>b</sup> Heena,<sup>c</sup> Saakshi Saini,<sup>d</sup> and Partha Roy<sup>d</sup>

<sup>a</sup> Department of Chemistry, School of Physical Sciences (SoPS), Doon University Dehradun 248012, Uttarakhand, India. E-mail: [vashisthjolly@gmail.com](mailto:vashisthjolly@gmail.com)

<sup>b</sup> Department of Chemistry, Indian Institute of Technology Roorkee, India -247667.

<sup>c</sup> Department of Chemistry, School of Engineering, UPES Dehradun 248007, Uttarakhand, India.

<sup>d</sup> Department of Biosciences and Bioengineering, Indian Institute of Technology Roorkee 247667, Uttarakhand, India.

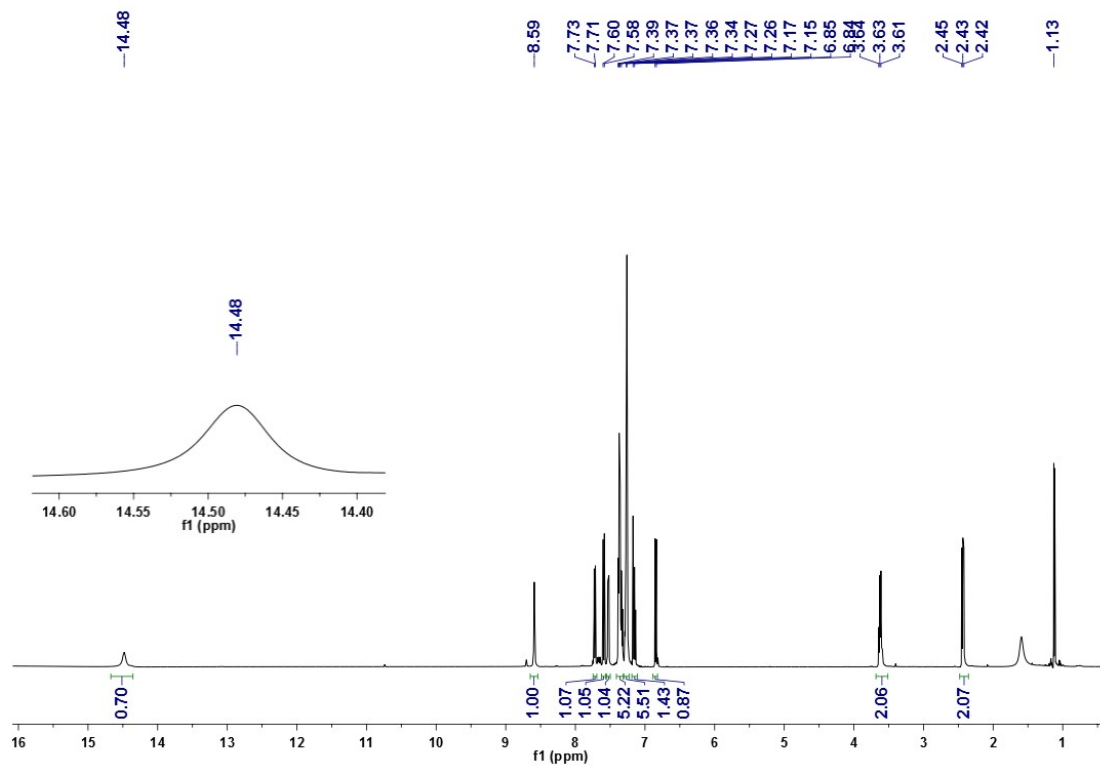

**Fig. S1.**  $^1\text{H}$  NMR spectrum of **HL** in  $\text{CDCl}_3$  at room temperature.  $^1\text{H}$  NMR ( $\text{CDCl}_3$ , 500 MHz, TMS),  $\delta$  (ppm): 14.48 (s, 1H, broad,  $-\text{OH}$ ), 8.59 (s, 1H,  $-\text{CH}=\text{N}-$ ), 7.72 (d, 1H), 7.59 (d, 1H), 7.52 (d, 1H), 7.39-7.34 (m, 5H), 7.28-7.25 (m, 6H), 7.17-7.14 (m, 1H), 6.84 (d, 1H), 3.63 (t, 2H,  $-\text{CH}_2-\text{N}-$ ), 2.43 (t, 2H,  $-\text{CH}_2-\text{P}<$ ).

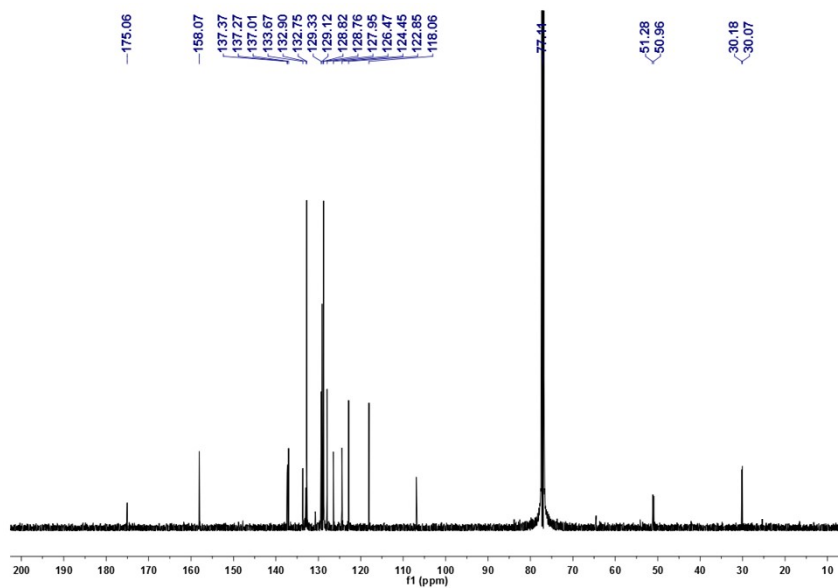

**Fig. S2.**  $^{13}\text{C}$  NMR spectrum of **HL** in  $\text{CDCl}_3$  at room temperature.  $^{13}\text{C}$  NMR ( $\text{CDCl}_3$ , 500 MHz),  $\delta$  (ppm): 175.06, 158.07, 137.37, 137.27, 137.01, 133.67, 132.90, 132.75, 129.33, 129.12, 128.82, 128.76, 127.95, 126.47, 124.45, 122.85, 118.06, 50.62, 30.12.

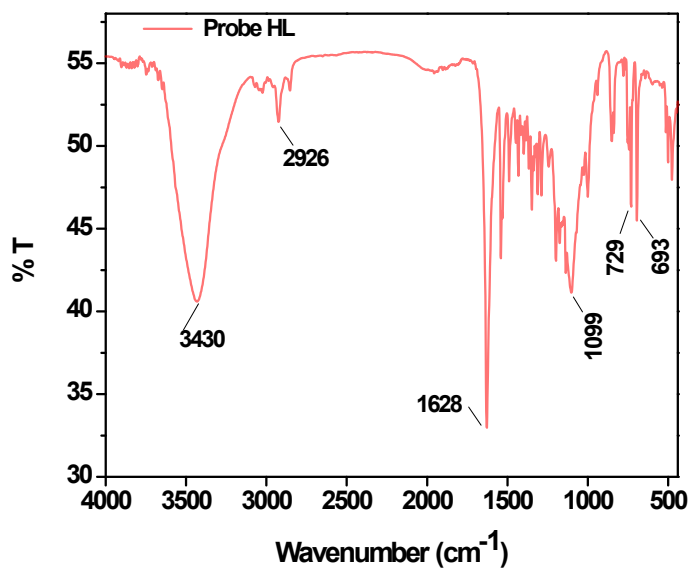

**Fig. S3.** FT-IR spectrum of **HL**. IR data (KBr disk): 3430, 2926, 1628 ( $\nu_{\text{C}=\text{N}}$ ), 1480, 1430, 1099, 729, 693, 514 ( $\nu_{\text{PPh}_2}$ )  $\text{cm}^{-1}$ .

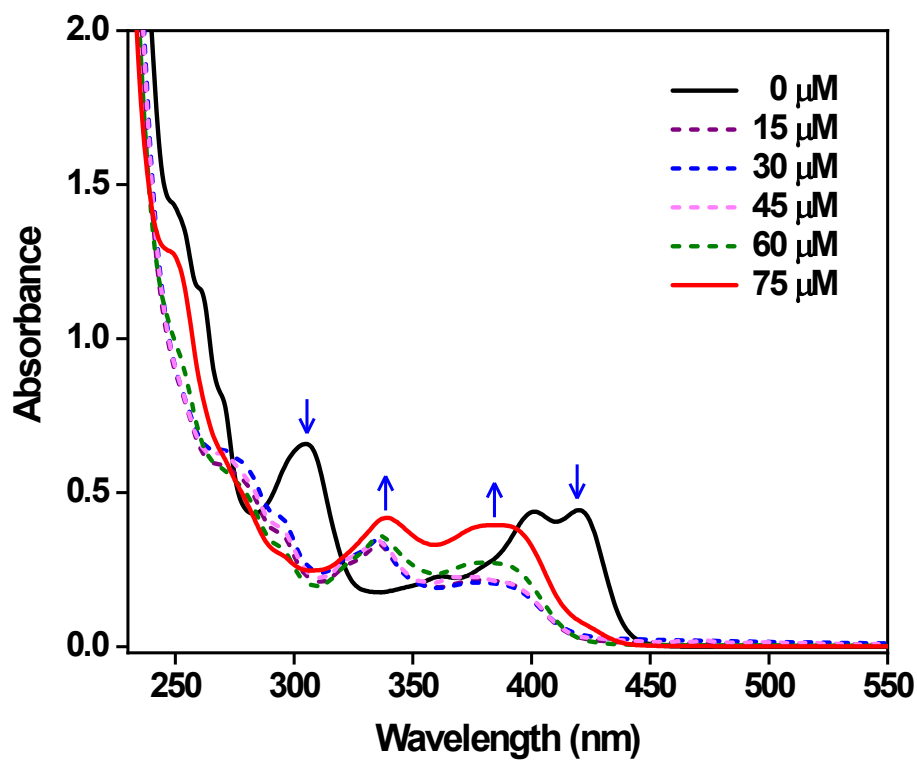

**Fig. S4.** Changes observed in UV-visible spectra of **HL** ( $3.3 \times 10^{-5}$  M) in the presence of 0–75  $\mu\text{M}$  of  $\text{Al}^{3+}$  ions in  $\text{CH}_3\text{CN}$  solution.

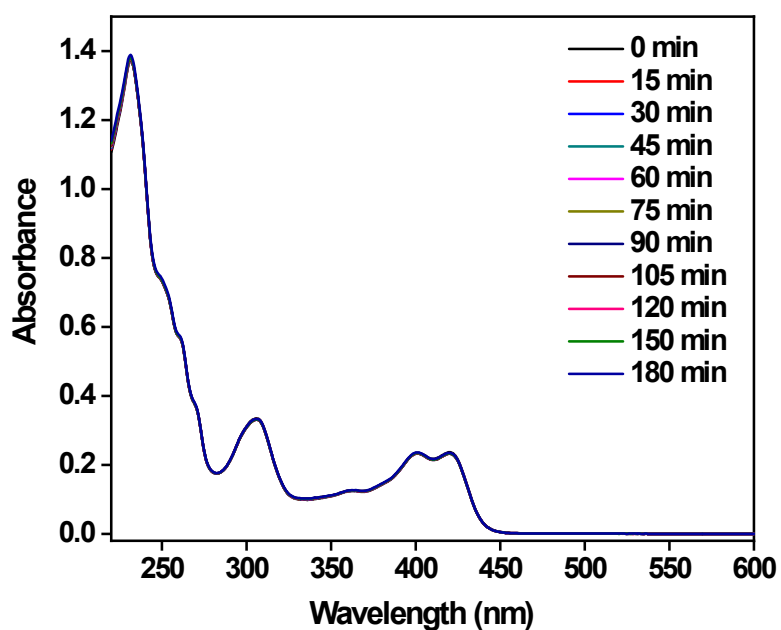

**Fig. S5.** The stability of fluorescent probe **HL**. UV-visible spectral changes observed for **HL** in  $\text{CH}_3\text{CN}$  solution with different intervals of time.

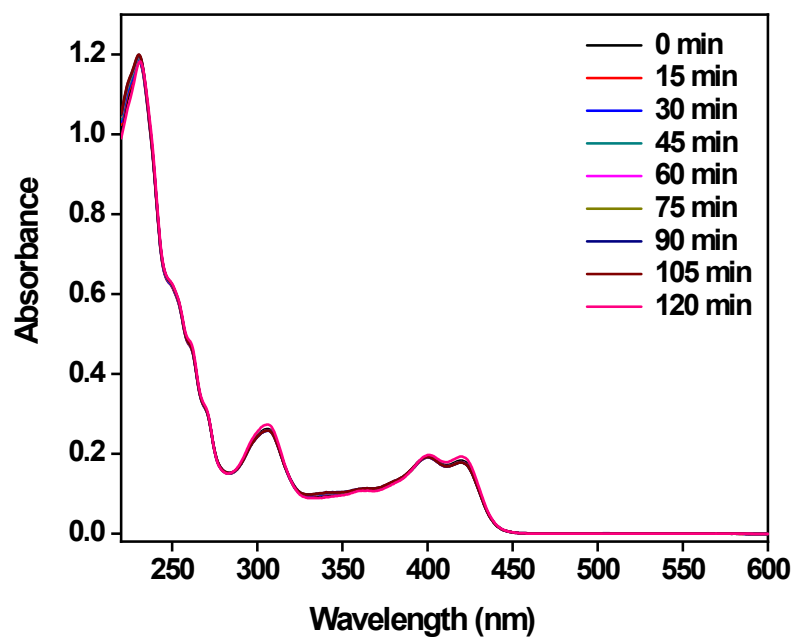

**Fig. S6.** The stability of fluorescent probe **HL**. UV-visible spectral changes observed for **HL** in  $\text{CH}_3\text{CN-H}_2\text{O}$  (4:1, v/v) mixture with different intervals of time.

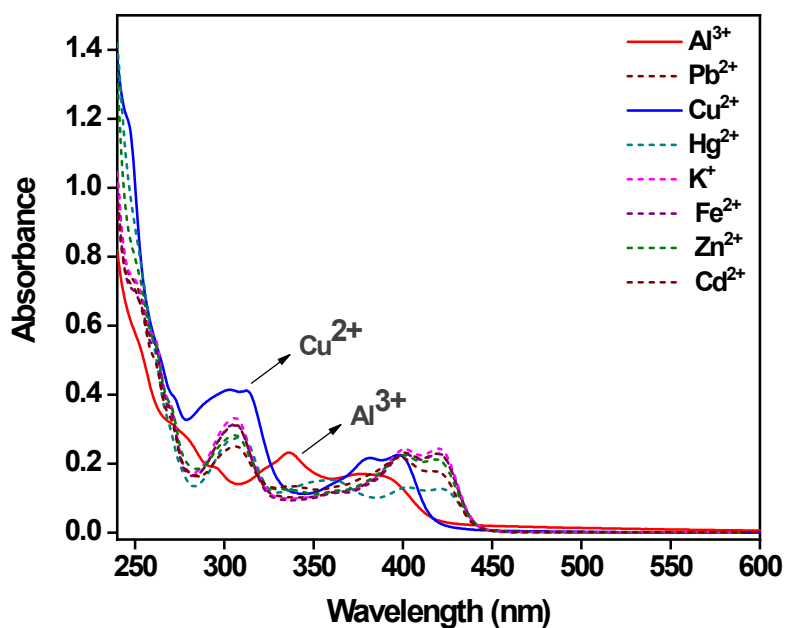

**Fig. S7.** Absorption spectra of **HL** ( $3.3 \times 10^{-5}$  M) on exposure to 3.0 equivalents (i.e.,  $100 \mu\text{M}$ ) of selected metal ions in  $\text{CH}_3\text{CN-H}_2\text{O}$  (4:1, v/v) mixture.

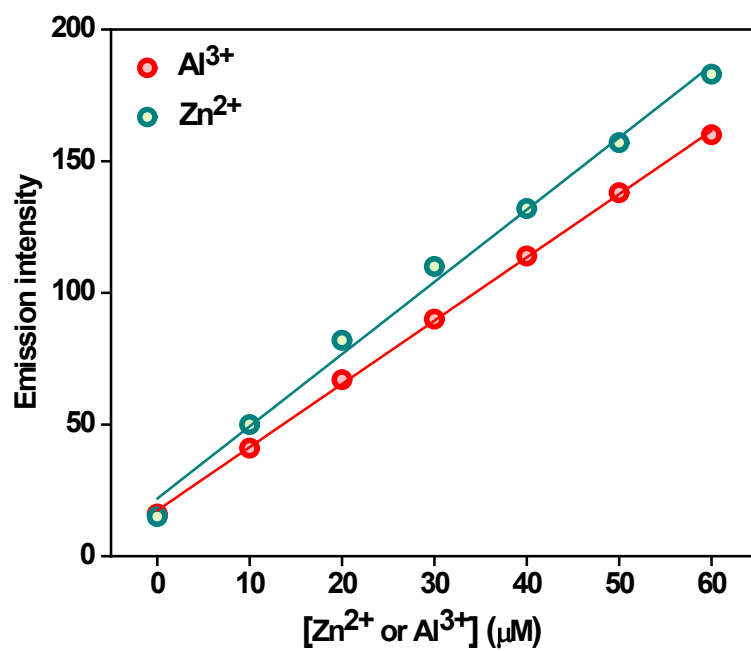

**Fig. S8.** Detection limits for Al<sup>3+</sup> (red circles) and Zn<sup>2+</sup> ions (green circles).

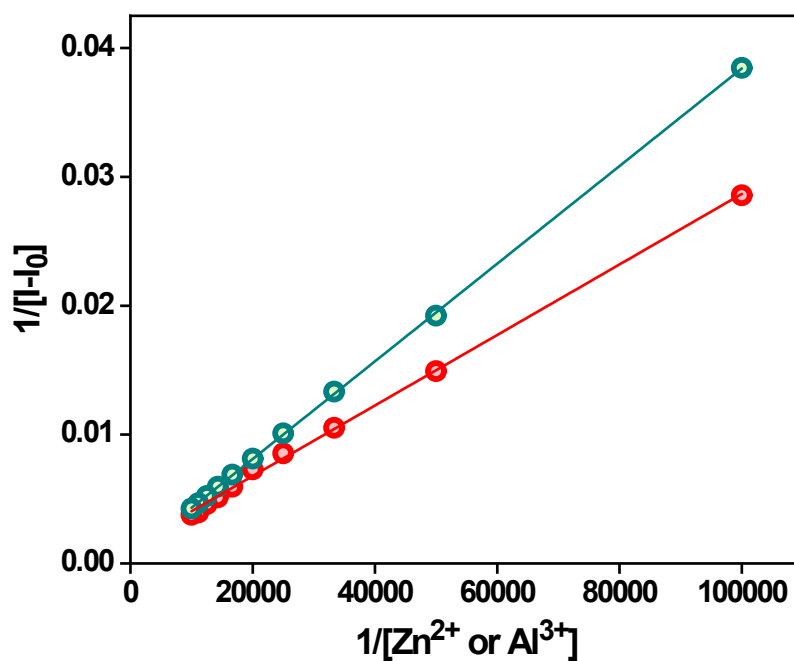

**Fig. S9.** Benesi-Hildebrand plots of HL for Al<sup>3+</sup> (red circles) and Zn<sup>2+</sup> ions (green circles).

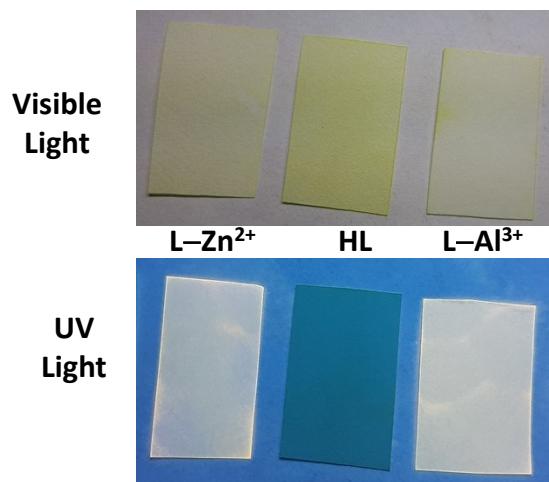

**Fig. S10.** Detection using paper strips, showing color changes of probe **HL** with  $\text{Zn}^{2+}$  and  $\text{Al}^{3+}$  ions under visible light (top) and ultraviolet light (bottom).

**Table S1.** Changes in yield of **HL** upon  $\text{Zn}^{2+}$ .

| Compound                              | Emission quantum Yield ( $\Phi_{em}$ ) |
|---------------------------------------|----------------------------------------|
| <b>HL</b>                             | 0.06                                   |
| <b>HL-<math>\text{Al}^{3+}</math></b> | 0.35                                   |
| <b>HL-<math>\text{Zn}^{2+}</math></b> | 0.28                                   |

the emission quantum addition of  $\text{Al}^{3+}$  and

**Table S2.** Comparative sensing performance of previously reported  $\text{Al}^{3+}/\text{Zn}^{2+}$  responsive probes with this work.

| S.No | Structure of probe | Target ion                           | LoD ( $\mu\text{M}$ ) | Binding constant ( $\text{M}^{-1}$ )   | Applications                             | Ref. |
|------|--------------------|--------------------------------------|-----------------------|----------------------------------------|------------------------------------------|------|
| 1.   |                    | $\text{Al}^{3+}$<br>$\text{Zn}^{2+}$ | 0.053<br>0.079        | $1.5 \times 10^5$<br>$6.0 \times 10^5$ | Industry wastewater<br>Live cell imaging | [1]  |
| 2.   |                    | $\text{Al}^{3+}$                     | 7.06                  | $1.32 \times 10^7$                     | Live cell imaging                        | [2]  |

|    |                                                                                     |                  |        |                        |                   |                  |
|----|-------------------------------------------------------------------------------------|------------------|--------|------------------------|-------------------|------------------|
|    |                                                                                     | Zn <sup>2+</sup> | 2.98   | 1.92 x 10 <sup>4</sup> |                   |                  |
| 3. | 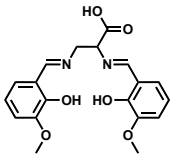   | Al <sup>3+</sup> | 0.0018 | 5.83 x 10 <sup>4</sup> | Live cell imaging | [3]              |
|    |                                                                                     | Zn <sup>2+</sup> | 0.0076 | 7.71 x 10 <sup>4</sup> | Paper strips      |                  |
| 4. |    | Al <sup>3+</sup> | 0.012  | 3.77 x 10 <sup>4</sup> | Live cell imaging | [4]              |
|    |                                                                                     | Zn <sup>2+</sup> | 0.014  | 6.58 x 10 <sup>4</sup> | Distilled water   |                  |
|    |                                                                                     |                  |        |                        | Tap water         |                  |
|    |                                                                                     |                  |        |                        | Lake water        |                  |
| 5. |    | Al <sup>3+</sup> | 0.233  | 2.03 x 10 <sup>4</sup> | Cotton swabs      | [5]              |
|    |                                                                                     | Zn <sup>2+</sup> | 0.168  | 1.15 x 10 <sup>4</sup> | Potable water     |                  |
|    |                                                                                     |                  |        |                        | Drug sample       |                  |
| 6. |   | Al <sup>3+</sup> | 0.085  | 2.01 x 10 <sup>4</sup> | Live cell imaging | [6]              |
|    |                                                                                     | Zn <sup>2+</sup> | 0.188  | 6.84 x 10 <sup>4</sup> |                   |                  |
| 7. |  | Al <sup>3+</sup> | 0.038  | 1.18 x 10 <sup>6</sup> | Paper strips      | [7]              |
|    |                                                                                     | Zn <sup>2+</sup> | 0.043  | 3.5 x 10 <sup>5</sup>  | Distilled water   |                  |
|    |                                                                                     |                  |        |                        | Tap water         |                  |
|    |                                                                                     |                  |        |                        | Soil samples      |                  |
| 8. |  | Al <sup>3+</sup> | 0.62   | 1.39 x 10 <sup>3</sup> | Paper strips      | <b>This work</b> |
|    |                                                                                     | Zn <sup>2+</sup> | 0.54   | 4.78 x 10 <sup>3</sup> | Live cell imaging |                  |
|    |                                                                                     |                  |        |                        | Tap water         |                  |
|    |                                                                                     |                  |        |                        | Distilled water   |                  |

**Table S3.** Changes in HOMO-LUMO gaps of **HL** in presence and absence of Al<sup>3+</sup> and Zn<sup>2+</sup>.

| Compound                    | E <sub>HOMO</sub> (eV) | E <sub>LUMO</sub> (eV) | ΔE (eV) |
|-----------------------------|------------------------|------------------------|---------|
| <b>HL</b>                   | -5.548                 | -1.513                 | 4.035   |
| <b>HL + Al<sup>3+</sup></b> | -6.289                 | -2.943                 | 3.346   |
| <b>HL + Zn<sup>2+</sup></b> | -5.689                 | --2.037                | 3.652   |



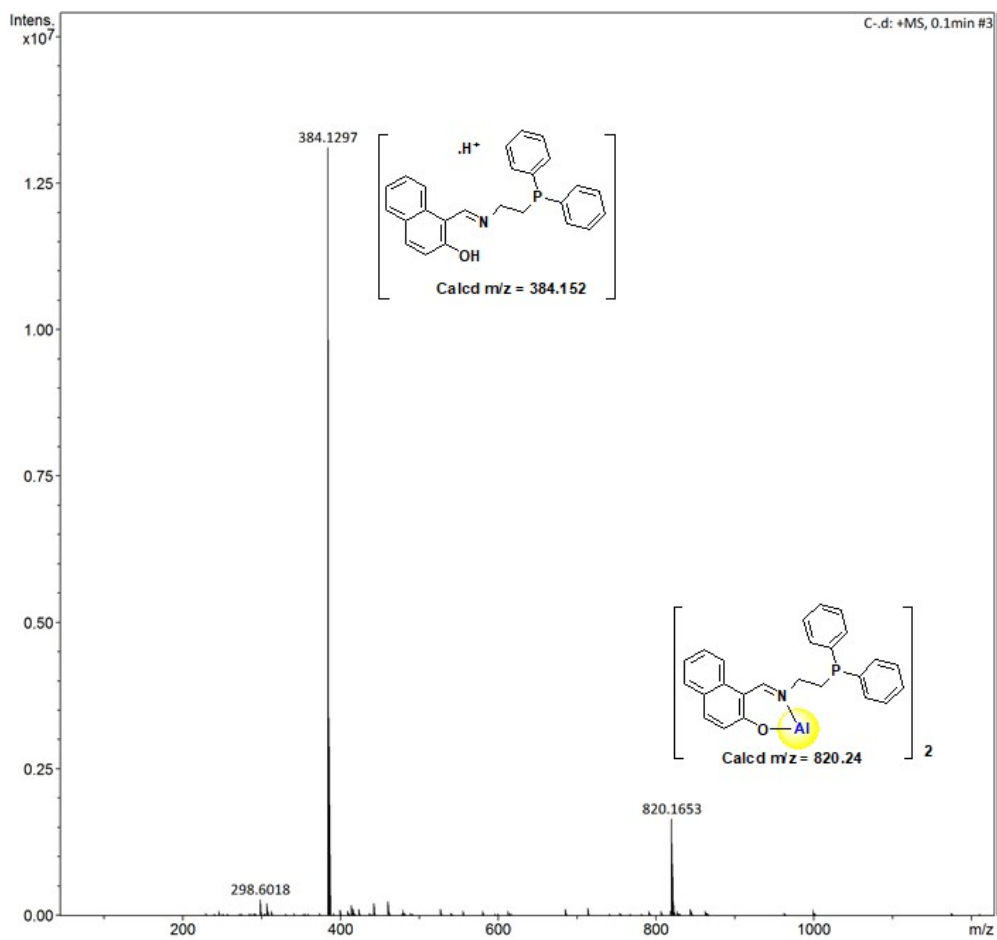

**Fig. S11** ESI-mass spectrum of probe **HL** treated with 3.0 equiv. of  $\text{Al}^{3+}$  ions in methanol at room temperature.

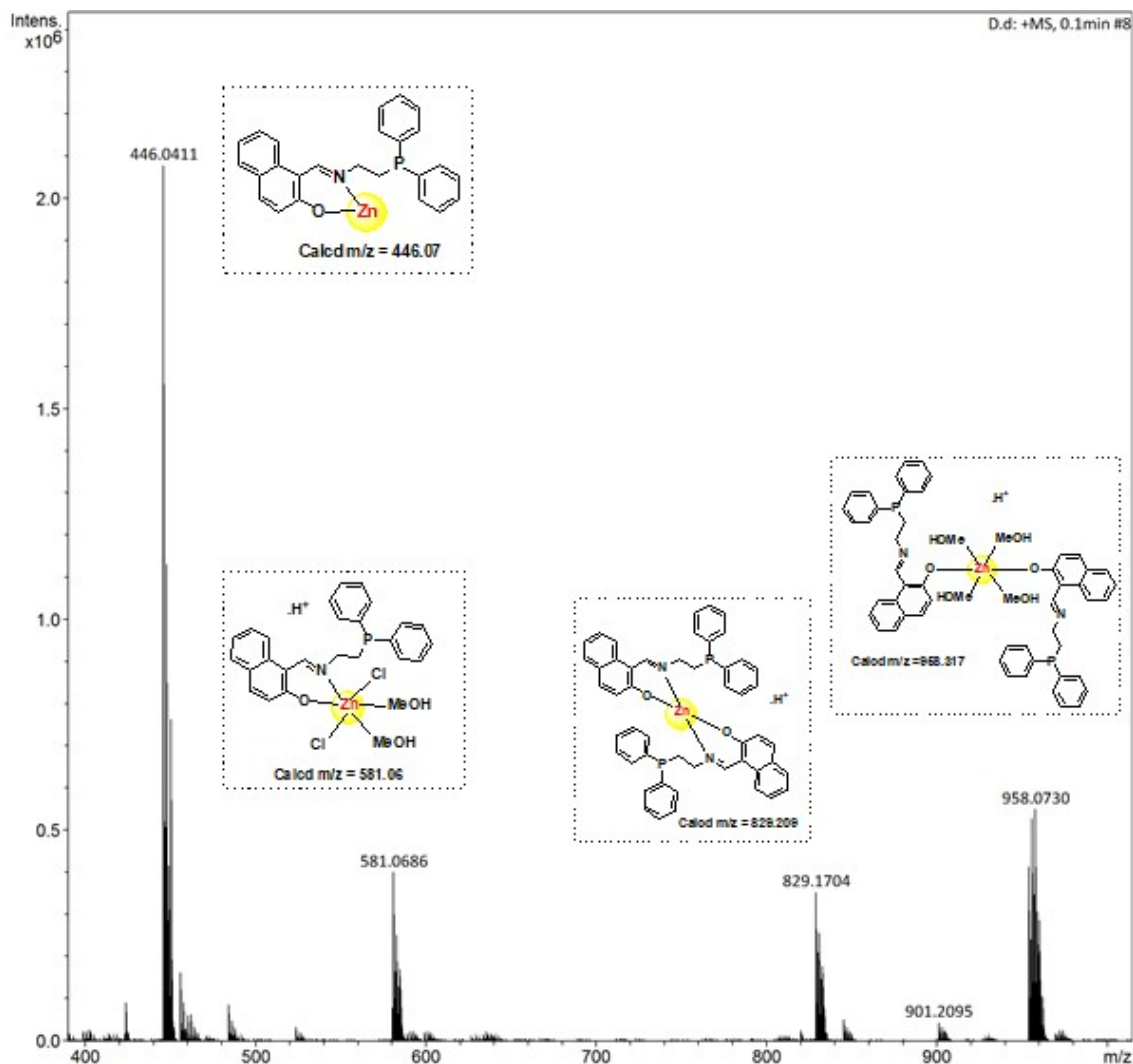

**Fig. S12** ESI-mass spectrum of probe **HL** treated with 3.0 equiv. of  $\text{Zn}^{2+}$  ions in methanol at room temperature.

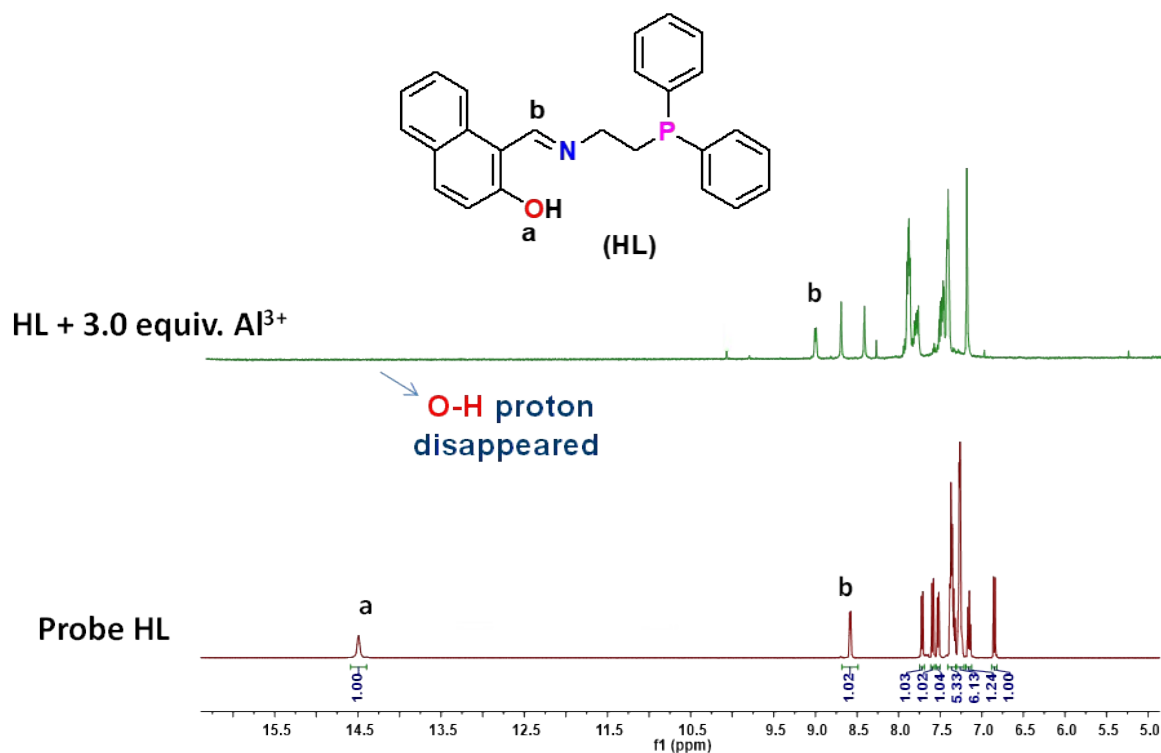

Fig. S13. <sup>1</sup>H NMR titrations of probe **HL** with 3.0 equiv. of Al<sup>3+</sup> ions in DMSO-*d*<sub>6</sub> at room temperature.

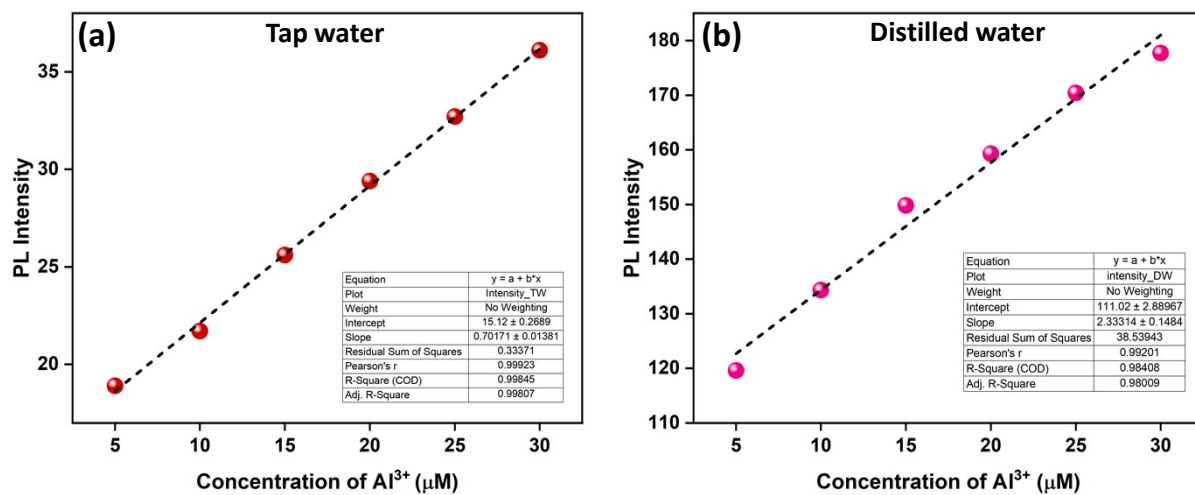

Fig. S14 Variation in emission intensity of **HL** upon gradual addition of Al<sup>3+</sup> in (a) tap water and (b) distilled water.

**Table S4.** Detection of Al<sup>3+</sup> in real samples.

| Real Samples    | Al <sup>3+</sup> added (μM) | Al <sup>3+</sup> detected (μM) | % Recovery |
|-----------------|-----------------------------|--------------------------------|------------|
| Tap water       | 5                           | 5.4                            | 108        |
|                 | 10                          | 9.38                           | 93.8       |
|                 | 15                          | 14.97                          | 99.8       |
|                 | 20                          | 20.7                           | 103.5      |
|                 | 25                          | 25.11                          | 100.4      |
|                 | 30                          | 29.9                           | 99.6       |
| Distilled water | 5                           | 3.69                           | 73.8       |
|                 | 10                          | 10                             | 100        |
|                 | 15                          | 16.65                          | 111        |
|                 | 20                          | 20.7                           | 103.5      |
|                 | 25                          | 25.4                           | 101.6      |
|                 | 30                          | 28.6                           | 95.3       |

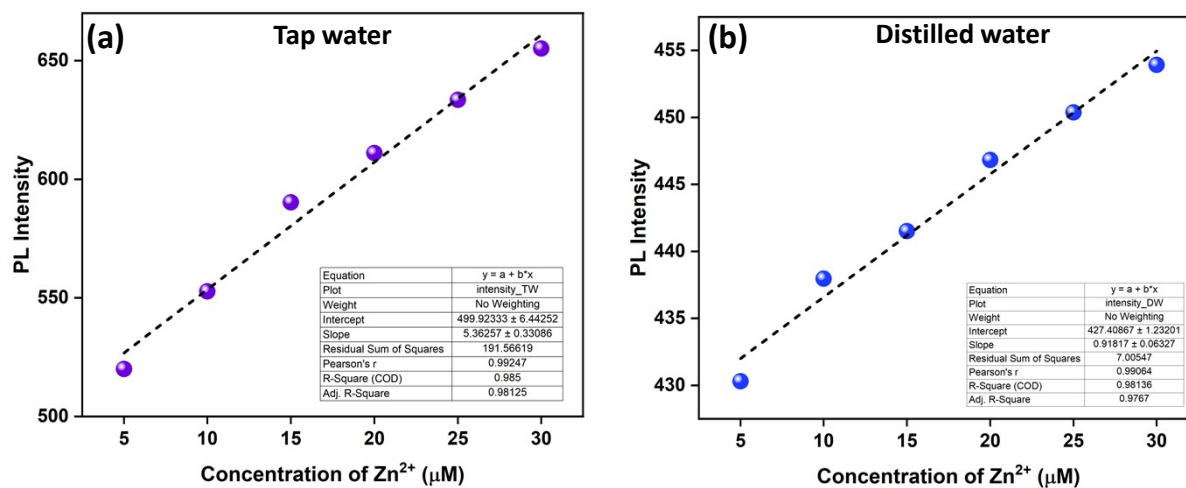

**Fig. S15** Variation in emission intensity of HL upon gradual addition of Zn<sup>2+</sup> in (a) tap water and (b) distilled water.

**Table S5.** Detection of Zn<sup>2+</sup> in real samples.

| <b>Real Samples</b>    | <b>Zn<sup>2+</sup> added (μM)</b> | <b>Zn<sup>2+</sup> detected (μM)</b> | <b>% Recovery</b> |
|------------------------|-----------------------------------|--------------------------------------|-------------------|
| <b>Tap water</b>       | 5                                 | 3.91                                 | 78.35             |
|                        | 10                                | 10.02                                | 100.27            |
|                        | 15                                | 17.03                                | 113.5             |
|                        | 20                                | 20.89                                | 104.47            |
|                        | 25                                | 25.08                                | 100.3             |
|                        | 30                                | 29.13                                | 97.10             |
| <b>Distilled water</b> | 5                                 | 4.8                                  | 96                |
|                        | 10                                | 11.49                                | 114.92            |
|                        | 15                                | 15.35                                | 102.39            |
|                        | 20                                | 21.15                                | 105.77            |
|                        | 25                                | 25.02                                | 100.08            |
|                        | 30                                | 28.8                                 | 96.29             |

## References

1. G. Zhao, G. Wei, Z. Yan, B. Guo, S. Guang, R. Wu, and H. Xu, *Anal. Chim. Acta*, 2020,1095, 185-196.
2. Z. Li, J. Wang, L. Xiao, J. Wang and H. Yan, *Inorg. Chim. Acta*, 2021, 516, 120147.
3. M. Theetharappan, and M. A. Neelakantan. *J. Fluoresc.*, 2021, 31, 1277-1290.
4. S. Gong, Y. Zhang, A. Qin, M. Li, Y. Gao, C. Zhang, J. Song, X. Xu, Z. Wang, and S. Wang, *Analyst*, 2022, 147, 87-100.
5. Y. Liu, M. Wu, J. Zhao, Y. Wang, and Y. Zhang. *Rev Anal. Chem.*, 2022, 41, 217-227.
6. S.S. Samanta, P. K. Giri, S. Giri, A. Ghosh, and A. Misra. *J. Mol. Struct.* 2023, 1278, 134927.
7. S. Naithani, N. Goswami, S. Singh, V. Yadav, S. Kumar, P. Kumar, A. Kumar, T. Goswami and S. Kumar, *Anal. Methods*, 2023, 15, 6021–6030.
